# Supplementary material
Source: ML conference proceedings conference paper supplement (https://openaccess.thecvf.com/content/WACV2024/html/Feng_RankDVQA_Deep_VQA_WACV_2024_paper.html)
Supplement: Supplementary file 1 [file Feng_RankDVQA_Deep_VQA_WACV_2024_supplemental.pdf]

# RankDVQA: Deep VQA based on Ranking-inspired Hybrid Training

## Supplementary Material

Chen Feng, Duolikun Danier, Fan Zhang and David Bull  
*Visual Information Laboratory, University of Bristol, Bristol, UK, BS1 5DD*  
{chen.feng, duolikun.danier, fan.zhang, dave.bull}@bristol.ac.uk

### A. Training Database Generation in Stage 1

To generate the training content, we used 230 HD source sequences from the BVI-DVC [16] and the CVPR 2022 CLIC video compression challenge [7] database. These sequences (and their re-sampled versions, see Section 3.1 in the main paper) were compressed using four different video codecs at four quantization levels to create diverse distortion types. The codec versions and configurations are summarized in Table 1.

### B. Comprehensive Evaluation Results

In the main paper, we evaluated the performance of the proposed metrics (FR-RankDVQA and NR-RankDVQA) and 18 (10 for FR and 8 for NR) competing metrics using the Spearman Rank Order Correlation Coefficient (SROCC) and an F-test. Here, we additionally test the performance of these methods with the Pearson Linear Correlation Coefficient (PLCC), the Outlier Ratio (OR) and the Root Mean Squared Error (RMSE). Furthermore, we benchmark our approaches against three additional deep learning-based metrics (WaDIQA [1], VSFA [13], CONVIQT [18] (unsupervised learning) and RAPIQUE [24]). The full SROCC, PLCC, RMSE and OR results are summarized in Table 2, 3, 4 and 5 respectively. It can be observed that the proposed FR-RankDVQA and NR-RankDVQA show the best overall performance compared to other quality metrics in each track (FR and NR).

### C. Full Complexity Figures

Table 2 (Complexity column) also presents the complexity figures of proposed metrics and other benchmark metrics. It is noted that the average time required by FR-RankDVQA to process one HD frame ( $1920 \times 1080$ ) is 3.88 times that of VMAF, similar to other under-performing deep FR-VQA methods, such as DeepVQA [11] ( $4.05\times$ ) and C3DVQA [27] ( $3.37\times$ ). The runtime was estimated using a computer with a 2.4GHz Intel CPU and an NVIDIA P100 graphic card.

### D. Detailed Quantitative Evaluation on Single Sources

As we discussed in the main paper, it is important for any VQA method to accurately differentiate the quality between distorted versions of the same source or from different sources. Due to limited space, we only summarized the overall SROCC values for single sources, but did not provide full quantitative results for each database. Here we report the single-source SROCC values for all tested methods, following the calculation procedures in [9]. Specifically, the SROCC value is first calculated based on all the distorted sequences for each source content, and these SROCC values are averaged among all sources for each database and reported in Table 6.

### E. Additional Ablation Study Results

**Effectiveness of the residual patch.** In the main paper, we only presented key ablation study results where the primary contributions of the proposed methods including PQANet, STANet and the ranking-inspired losses are evaluated. To further verify the contribution of the residual patch in Stage 1 (see Section 3.1 of main paper), which was not included in the [9], we removed the residual patch calculation step from the proposed PQANet, and concatenated features  $[\mathcal{F}_D \mathcal{F}_{\text{diff}} \mathcal{F}_R]$  after the Feature Extraction (FE) Module, where the  $\mathcal{F}_{\text{diff}}$  is the difference feature maps between two normalized features  $\mathcal{F}_D$  and  $\mathcal{F}_R$ .

$$\mathcal{F}_{\text{diff}} = \|\mathbf{f}_{\text{norm}}(\mathcal{F}_D) - \mathbf{f}_{\text{norm}}(\mathcal{F}_R)\|_1. \quad (1)$$

This variant, denoted as V5 (Res), is similar to that in [9], and its performance is reported in Table 7 alongside other ablation study results. By comparing this variant to FR-RankDVQA, we can observe higher SROCC values for the latter on all tested video databases. This confirms the effectiveness of using residual frames in Stage 1.

| Codec     | Version            | Configuration parameters                            |
|-----------|--------------------|-----------------------------------------------------|
| H.264/AVC | x264-r3094-bfc87b7 | Preset veryslow configuration [6]. QP=[32,37,42,47] |
| HEVC HM   | 16.20              | Random access configuration [22]. QP=[32,37,42,47]  |
| AOM AV1   | 1.0.0-5ec3e8c      | The same configuration as in [28]. QP=[32,43,55,63] |
| VVC VTM   | 7.0                | Random access configuration [2]. QP=[32,37,42,47]   |

Table 1. The employed video codecs and configurations.

| SROCC <sup>†</sup> (F-test) | NFLX              | NFLX-P            | BVI-HD             | BVI-CCHD          | BVI-CCHDO         | MCL-V              | SHVC              | VQEGHD3            | Overall       | Complexity |
|-----------------------------|-------------------|-------------------|--------------------|-------------------|-------------------|--------------------|-------------------|--------------------|---------------|------------|
| Full Reference VQA Methods  |                   |                   |                    |                   |                   |                    |                   |                    |               |            |
| PSNR                        | 0.6218 (-1)       | 0.6596 (-1)       | 0.6143 (-1)        | 0.6166 (-1)       | 0.7497 (-1)       | 0.4640 (-1)        | 0.7380 (-1)       | 0.7518 (-1)        | 0.6520        | 0.35×      |
| SSIM [25]                   | 0.5638 (-1)       | 0.6054 (-1)       | 0.5992 (-1)        | 0.7194 (-1)       | 0.8026 (-1)       | 0.4018 (-1)        | 0.5446 (-1)       | 0.7361 (-1)        | 0.6216        | 0.38×      |
| MS-SSIM [26]                | 0.7136 (-1)       | 0.7394 (-1)       | 0.7652 (-1)        | 0.7534 (-1)       | 0.8321 (0)        | 0.6306 (-1)        | 0.8007 (0)        | <b>0.8457</b> (-1) | 0.7601        | 0.47×      |
| WaDIQA [1]                  | 0.5713 (-1)       | 0.6593 (-1)       | 0.6646 (-1)        | 0.6516 (-1)       | 0.7041 (-1)       | 0.6072 (-1)        | 0.6731 (-1)       | 0.6910 (-1)        | 0.6528        | 1.29×      |
| DeepQA [10]                 | 0.7298 (-1)       | 0.6995 (-1)       | 0.7106 (-1)        | 0.6202 (-1)       | 0.6705 (-1)       | 0.6832 (-1)        | 0.7176 (-1)       | 0.7881 (-1)        | 0.7024        | 1.76×      |
| LPIPS [29]                  | 0.6793(-1)        | 0.7859 (-1)       | 0.6670 (-1)        | 0.6838 (-1)       | 0.7678 (-1)       | 0.6579 (-1)        | 0.6360 (-1)       | 0.8075 (0)         | 0.7107        | 2.03×      |
| DeepVQA [11]                | 0.7352 (-1)       | 0.7609 (-1)       | 0.7330 (-1)        | 0.6924 (-1)       | 0.8120 (0)        | 0.6142 (-1)        | 0.8041 (0)        | 0.7805 (-1)        | 0.7540        | 4.05×      |
| C3DVQA [27]                 | 0.7730 (-1)       | 0.7714 (-1)       | 0.7393 (-1)        | 0.7203 (-1)       | 0.8137 (0)        | 0.7126 (-1)        | 0.8194 (0)        | 0.7329 (-1)        | 0.7641        | 3.37×      |
| DISTS [5]                   | 0.7787 (-1)       | <b>0.9325</b> (0) | 0.7030 (-1)        | 0.6303 (-1)       | 0.7442 (-1)       | <b>0.7792</b> (-1) | 0.7813 (0)        | 0.8254 (0)         | 0.7718        | 2.28×      |
| ST-GREED [17]               | 0.7470 (-1)       | 0.7445 (-1)       | 0.7769 (-1)        | 0.7738 (-1)       | 0.8259 (0)        | 0.7226 (-1)        | 0.7946 (0)        | 0.8079 (-1)        | 0.7842        | 0.83×      |
| VMAF 0.6.1 [15]             | <b>0.9254</b> (0) | <b>0.9104</b> (0) | <b>0.7962</b> (-1) | <b>0.8723</b> (0) | <b>0.8783</b> (0) | 0.7766 (-1)        | <b>0.9114</b> (0) | 0.8442 (-1)        | <b>0.8644</b> | 1×         |
| <b>FR-RankDVQA</b>          | <b>0.9393</b>     | <b>0.9184</b>     | <b>0.8659</b>      | <b>0.8991</b>     | <b>0.9037</b>     | <b>0.8391</b>      | <b>0.9142</b>     | <b>0.8979</b>      | <b>0.8972</b> | 3.88×      |
| No reference VQA methods    |                   |                   |                    |                   |                   |                    |                   |                    |               |            |
| VIIDEO [20]                 | 0.4550 (-1)       | 0.5527 (-1)       | 0.1297 (-1)        | 0.1308 (-1)       | 0.2523 (-1)       | 0.0406 (-1)        | 0.2033 (-1)       | 0.1881 (-1)        | 0.2440        | 5.61×      |
| TLVQM [12]                  | 0.4652 (-1)       | 0.4720 (-1)       | 0.3124 (-1)        | 0.1622 (-1)       | 0.3420 (-1)       | 0.2758 (-1)        | 0.4983 (0)        | 0.5382 (-1)        | 0.3469        | 1.68×      |
| VSFA [13]                   | 0.6221 (-1)       | 0.6993 (-1)       | 0.2118 (-1)        | 0.3480 (-1)       | 0.3876 (-1)       | 0.2978 (-1)        | 0.3031 (-1)       | 0.5350 (-1)        | 0.4256        | 11.2×      |
| BRISQUE [19]                | 0.7828 (0)        | 0.7861 (0)        | 0.2033 (-1)        | 0.3738 (-1)       | 0.3746 (-1)       | 0.3154 (-1)        | 0.3601 (-1)       | 0.5467 (-1)        | 0.4716        | 0.06×      |
| NIQE [21]                   | 0.7959 (0)        | <b>0.8269</b> (0) | 0.1932 (-1)        | 0.4247 (-1)       | 0.5225 (-1)       | 0.3985 (-1)        | 0.6210 (0)        | 0.5291 (-1)        | 0.5390        | 0.12×      |
| MDTVSFA [14]                | 0.5137 (-1)       | 0.6024 (-1)       | 0.3725 (-1)        | 0.4068 (-1)       | 0.5547 (-1)       | 0.5712 (0)         | 0.6165 (0)        | 0.6422 (0)         | 0.5311        | 6.98×      |
| CONVIQT [18]                | 0.6989 (-1)       | <b>0.7962</b> (0) | 0.3489 (-1)        | 0.3706 (-1)       | 0.5381(-1)        | 0.6323 (0)         | 0.4983 (0)        | 0.6217 (0)         | 0.5631        | 0.98×      |
| RAPIQUE [24]                | 0.6178 (-1)       | 0.6962 (-1)       | 0.5690 (-1)        | 0.6024 (-1)       | 0.5951 (-1)       | 0.5392 (-1)        | 0.5477 (0)        | <b>0.7240</b> (0)  | 0.6114        | 0.34×      |
| VIDEVAL [23]                | 0.7899 (0)        | 0.7261 (0)        | <b>0.5884</b> (-1) | 0.6974 (0)        | 0.7620 (0)        | 0.4836 (-1)        | 0.6428 (0)        | 0.5326 (-1)        | 0.6529        | 2.54×      |
| GSTVQA [4]                  | <b>0.8109</b> (0) | 0.7858 (0)        | 0.4132 (-1)        | <b>0.7447</b> (0) | <b>0.7665</b> (0) | <b>0.7385</b> (0)  | <b>0.6710</b> (0) | <b>0.7011</b> (0)  | <b>0.7040</b> | 2.89×      |
| <b>NR-RankDVQA</b>          | <b>0.8346</b>     | <b>0.7944</b>     | <b>0.7326</b>      | <b>0.7628</b>     | <b>0.7994</b>     | <b>0.7631</b>      | <b>0.7118</b>     | <b>0.8346</b>      | <b>0.7791</b> | 3.76×      |

Table 2. The SROCC performance and relative complexity of the proposed methods and other benchmark approaches on eight HD test databases. The values in each cell x(y) correspond to the SROCC value (x) and F-test result (y) at 95% confidence interval. y=1 suggests that the metric is superior to FR-RankDVQA in the full reference track or NF-RankDVQA in the no reference track (y=-1 if the opposite is true), while y=0 indicates that there is no significant difference between them. The figures in red and blue indicate the highest and second highest SROCC values respectively in each column. The complexity column presents the run time of the proposed metrics and the competing metrics.

## F. Additional Subjective Examples

In the main paper, we only presented two visual examples. Here, in Figure 1, we have included additional subjective examples that further demonstrate the accurate quality prediction performance of the proposed method.

## G. Limitations of the proposed method

Despite the excellent performance achieved by the proposed approach on eight HD test databases, our focus in this work is solely on full HD compressed video content. The performance of this method on higher resolution (4K, 8K), higher frame rate (120fps, 240fps) or different video for-

| PLCC $\uparrow$            | NFLX   | NFLX-P | BVI-HD | BVI-CCHD | BVI-CCHDDO | MCL-V  | SHVC   | VQEGHD3 | Overall |
|----------------------------|--------|--------|--------|----------|------------|--------|--------|---------|---------|
| Full Reference VQA Methods |        |        |        |          |            |        |        |         |         |
| PSNR                       | 0.6436 | 0.7065 | 0.6238 | 0.6355   | 0.7488     | 0.4707 | 0.7370 | 0.7459  | 0.6640  |
| SSIM [25]                  | 0.5584 | 0.6368 | 0.5969 | 0.6752   | 0.7659     | 0.4033 | 0.4879 | 0.7066  | 0.6039  |
| MS-SSIM [26]               | 0.6879 | 0.7534 | 0.6840 | 0.7155   | 0.7285     | 0.6424 | 0.7236 | 0.7736  | 0.7136  |
| WaDIQA [1]                 | 0.7683 | 0.7842 | 0.7427 | 0.6488   | 0.7127     | 0.5954 | 0.5053 | 0.6972  | 0.6818  |
| DeepQA [10]                | 0.5943 | 0.6599 | 0.6540 | 0.6882   | 0.7557     | 0.5011 | 0.7350 | 0.7160  | 0.6630  |
| LPIPS [29]                 | 0.6348 | 0.7921 | 0.6541 | 0.6875   | 0.7582     | 0.6460 | 0.6071 | 0.7644  | 0.6930  |
| DeepVQA [11]               | 0.8092 | 0.7005 | 0.7489 | 0.6754   | 0.7491     | 0.6097 | 0.8109 | 0.7640  | 0.7335  |
| C3DVQA [27]                | 0.7633 | 0.7959 | 0.7830 | 0.7649   | 0.8462     | 0.7274 | 0.8398 | 0.7557  | 0.7845  |
| DISTS [5]                  | 0.7643 | 0.9195 | 0.6595 | 0.7038   | 0.7683     | 0.7718 | 0.8159 | 0.8020  | 0.7756  |
| ST-GREED [17]              | 0.7239 | 0.8186 | 0.7960 | 0.7562   | 0.8193     | 0.6943 | 0.7814 | 0.7975  | 0.7734  |
| VMAF 0.6.1 [15]            | 0.9333 | 0.9356 | 0.7921 | 0.8476   | 0.8840     | 0.7781 | 0.9379 | 0.8670  | 0.8720  |
| <b>FR-RankDVQA</b>         | 0.9295 | 0.9421 | 0.8817 | 0.8910   | 0.8728     | 0.8339 | 0.9065 | 0.9282  | 0.8982  |
| No reference VQA methods   |        |        |        |          |            |        |        |         |         |
| VIIDEO [20]                | 0.5608 | 0.6550 | 0.1695 | 0.2846   | 0.4272     | 0.0251 | 0.4745 | 0.1864  | 0.3479  |
| TLVQM [12]                 | 0.3898 | 0.3656 | 0.3357 | 0.3597   | 0.5380     | 0.4049 | 0.4215 | 0.3009  | 0.3895  |
| VSFA [13]                  | 0.5421 | 0.6401 | 0.2371 | 0.2612   | 0.3171     | 0.3417 | 0.4067 | 0.4942  | 0.4050  |
| BRISQUE [19]               | 0.7872 | 0.8551 | 0.2941 | 0.3135   | 0.4811     | 0.3212 | 0.4757 | 0.5788  | 0.5133  |
| NIQE [21]                  | 0.8161 | 0.8890 | 0.2087 | 0.5293   | 0.5789     | 0.3955 | 0.5461 | 0.5366  | 0.5625  |
| MDTVSFA [14]               | 0.5847 | 0.5935 | 0.3526 | 0.5337   | 0.5368     | 0.5075 | 0.5751 | 0.6469  | 0.5413  |
| CONVIQT [18]               | 0.7447 | 0.8442 | 0.3589 | 0.5102   | 0.5880     | 0.6136 | 0.5993 | 0.6430  | 0.6141  |
| RAPIQUE [24]               | 0.6952 | 0.7065 | 0.5957 | 0.6207   | 0.6153     | 0.6008 | 0.5573 | 0.7082  | 0.6375  |
| VIDEVAL [23]               | 0.7568 | 0.7447 | 0.6338 | 0.6706   | 0.7424     | 0.5294 | 0.5979 | 0.5362  | 0.6515  |
| GSTVQA [4]                 | 0.7896 | 0.7332 | 0.5569 | 0.6921   | 0.7131     | 0.7504 | 0.6319 | 0.6930  | 0.6950  |
| <b>NR-RankDVQA</b>         | 0.8269 | 0.8371 | 0.7083 | 0.7175   | 0.7859     | 0.7850 | 0.6936 | 0.7504  | 0.7631  |

Table 3. The PLCC performance of the proposed methods and other benchmark approaches on eight HD test databases. The figures in red and blue indicate the highest and second highest PLCC values respectively in each column.

mats (HDR or UGC content) has not been not fully investigated in this paper. As future work, it would be interesting to see how the proposed method generalizes to these content types. We are also aware of the relatively high complexity associated with this model, which leads to both slower inference speed and higher GPU memory usage. This is mainly due to the large size of the neural network involved. Various techniques such as model compression [3] and knowledge distillation [8], can be employed to reduce the model complexity and the number of network parameters. This will also be our future work.

| OR↓                        | NFLX | NFLX-P | BVI-HD | BVI-CCHD | BVI-CCHDDO | MCL-V  | SHVC | VQEGHD3 | Overall |
|----------------------------|------|--------|--------|----------|------------|--------|------|---------|---------|
| Full Reference VQA Methods |      |        |        |          |            |        |      |         |         |
| PSNR                       | -    | -      | 0.5677 | 0.5556   | 0.4000     | 0.6458 | -    | 0.5278  | 0.5394  |
| SSIM [25]                  | -    | -      | 0.5573 | 0.6389   | 0.6889     | 0.6875 | -    | 0.8611  | 0.6867  |
| MS-SSIM [26]               | -    | -      | 0.7292 | 0.6389   | 0.6889     | 0.7292 | -    | 0.8611  | 0.7294  |
| WaDIQA [1]                 | -    | -      | 0.7635 | 0.6389   | 0.6889     | 0.5312 | -    | 0.8611  | 0.6967  |
| DeepQA [10]                | -    | -      | 0.7329 | 0.6365   | 0.6256     | 0.7250 | -    | 0.7844  | 0.7009  |
| LPIPS [29]                 | -    | -      | 0.7292 | 0.6389   | 0.6889     | 0.7292 | -    | 0.8611  | 0.7294  |
| DeepVQA [11]               | -    | -      | 0.4583 | 0.4167   | 0.3889     | 0.7083 | -    | 0.8611  | 0.5667  |
| C3DVQA [27]                | -    | -      | 0.3958 | 0.2222   | 0.3222     | 0.5938 | -    | 0.4028  | 0.3874  |
| DISTS [5]                  | -    | -      | 0.7292 | 0.6389   | 0.6889     | 0.7292 | -    | 0.8611  | 0.7294  |
| ST-GREED [17]              | -    | -      | 0.4375 | 0.4444   | 0.4444     | 0.7292 | -    | 0.6667  | 0.5444  |
| VMAF 0.6.1 [15]            | -    | -      | 0.3958 | 0.2870   | 0.2556     | 0.4479 | -    | 0.3472  | 0.3467  |
| <b>FR-RankDVQA</b>         | -    | -      | 0.3750 | 0.2222   | 0.2333     | 0.4062 | -    | 0.2778  | 0.3029  |
| No reference VQA methods   |      |        |        |          |            |        |      |         |         |
| VIIDEO [20]                | -    | -      | 0.7188 | 0.6204   | 0.6222     | 0.7292 | -    | 0.8611  | 0.7103  |
| TLVQM [12]                 | -    | -      | 0.6979 | 0.6463   | 0.6556     | 0.6146 | -    | 0.8194  | 0.6868  |
| VSEA [13]                  | -    | -      | 0.8096 | 0.6019   | 0.6333     | 0.7083 | -    | 0.7778  | 0.7062  |
| BRISQUE [19]               | -    | -      | 0.6771 | 0.6389   | 0.5667     | 0.6875 | -    | 0.7222  | 0.6585  |
| NIQE [21]                  | -    | -      | 0.7188 | 0.5833   | 0.5556     | 0.6146 | -    | 0.6111  | 0.6167  |
| MDTVSFA [14]               | -    | -      | 0.7889 | 0.6111   | 0.6000     | 0.6883 | -    | 0.7778  | 0.6932  |
| CONVIQT [18]               | -    | -      | 0.6406 | 0.5556   | 0.5111     | 0.5833 | -    | 0.5417  | 0.5665  |
| RAPIQUE [24]               | -    | -      | 0.7563 | 0.5926   | 0.5778     | 0.6875 | -    | 0.7639  | 0.6756  |
| VIDEVAL [23]               | -    | -      | 0.6375 | 0.5764   | 0.5611     | 0.6755 | -    | 0.7275  | 0.6356  |
| GSTVQA [4]                 | -    | -      | 0.6106 | 0.5796   | 0.5463     | 0.6317 | -    | 0.7537  | 0.6244  |
| <b>NR-RankDVQA</b>         | -    | -      | 0.5208 | 0.5370   | 0.5111     | 0.5312 | -    | 0.6250  | 0.5450  |

Table 4. The outlier ratio (OR) performance of the proposed methods and other benchmark approaches on eight HD test databases. The figures in red and blue indicate the lowest and second lowest OR values respectively in each column. On NFLX, NFLX-P and SHVC databases, OR values cannot be calculated as the standard error for each subjective score is not available.

| RMSE↓                      |  | NFLX   | NFLX-P  | BVI-HD  | BVI-CCHD | BVI-CCHDDO | MCL-V  | SHVC   | VQEGHD3 |
|----------------------------|--|--------|---------|---------|----------|------------|--------|--------|---------|
| Full Reference VQA Methods |  |        |         |         |          |            |        |        |         |
| PSNR                       |  | 0.8711 | 18.1675 | 13.4933 | 12.4575  | 13.2023    | 1.9722 | 1.8148 | 0.6743  |
| SSIM [25]                  |  | 0.9442 | 19.7931 | 13.8163 | 16.9298  | 20.4117    | 2.0436 | 2.6850 | 1.0116  |
| MS-SSIM [26]               |  | 1.1382 | 25.6703 | 17.3173 | 16.9304  | 20.4118    | 2.2414 | 2.6850 | 0.6713  |
| WaDIQA [1]                 |  | 0.7286 | 15.9273 | 11.5064 | 16.9820  | 20.9321    | 2.2414 | 2.3170 | 1.0234  |
| DeepQA [10]                |  | 1.1055 | 24.8074 | 16.6020 | 16.2461  | 19.5864    | 2.2213 | 2.6670 | 0.9887  |
| LPIPS [29]                 |  | 1.1382 | 25.6703 | 17.3173 | 16.9298  | 20.4115    | 2.2414 | 2.6850 | 0.6696  |
| DeepVQA [11]               |  | 0.6687 | 18.3192 | 11.3789 | 16.8554  | 19.0823    | 2.2030 | 1.7713 | 0.6682  |
| C3DVQA [27]                |  | 0.7353 | 15.5421 | 10.9109 | 13.5351  | 13.4093    | 2.0251 | 1.5713 | 0.6713  |
| DISTS [5]                  |  | 1.1382 | 11.6703 | 17.3173 | 16.9298  | 20.4117    | 2.2414 | 1.7850 | 0.5816  |
| ST-GREED [17]              |  | 0.8478 | 15.6804 | 10.2283 | 13.7927  | 16.9766    | 2.0709 | 2.4554 | 0.5852  |
| VMAF 0.6.1 [15]            |  | 0.4086 | 9.0598  | 10.4955 | 7.9969   | 9.1395     | 1.3996 | 0.9316 | 0.5057  |
| <b>FR-RankDVQA</b>         |  | 0.4140 | 8.8504  | 8.5652  | 7.7287   | 9.1992     | 1.3063 | 0.9348 | 0.4895  |
| No reference VQA methods   |  |        |         |         |          |            |        |        |         |
| VIIDEO [20]                |  | 0.9424 | 19.3972 | 17.1016 | 16.0882  | 18.5468    | 2.2414 | 2.3639 | 1.0116  |
| TLVQM [12]                 |  | 1.0482 | 23.8930 | 16.2426 | 16.0748  | 17.4833    | 2.0519 | 2.4348 | 0.9691  |
| VSFA [13]                  |  | 1.0071 | 23.0343 | 17.0335 | 17.3363  | 19.3548    | 2.1744 | 2.5706 | 1.6880  |
| BRISQUE [19]               |  | 0.7020 | 13.3095 | 16.5372 | 16.2730  | 17.6206    | 2.1287 | 2.3618 | 0.8295  |
| NIQE [21]                  |  | 0.6578 | 11.7546 | 16.9631 | 14.1962  | 16.3204    | 2.0614 | 2.6850 | 0.8536  |
| MDTVSFA [14]               |  | 0.9587 | 21.9299 | 16.0909 | 14.0597  | 18.4092    | 2.1440 | 2.5257 | 0.9422  |
| CONVIQT [18]               |  | 0.7441 | 12.6833 | 16.0597 | 13.2822  | 16.2269    | 1.7407 | 2.6170 | 0.9873  |
| RAPIQUE [24]               |  | 0.9370 | 21.7140 | 14.9286 | 16.7457  | 17.6228    | 2.1307 | 2.5265 | 0.8116  |
| VIDEVAL [23]               |  | 0.7219 | 21.5357 | 14.8032 | 16.6525  | 16.1987    | 2.0668 | 2.3504 | 0.9164  |
| GSTVQA [4]                 |  | 0.7031 | 20.9120 | 15.6097 | 13.1453  | 17.0783    | 1.7349 | 2.4956 | 0.8942  |
| <b>NR-RankDVQA</b>         |  | 0.6205 | 12.9074 | 13.6189 | 13.0835  | 16.0654    | 1.7385 | 2.2541 | 0.8052  |

Table 5. The root mean squared error (RMSE) performance of the proposed methods and other benchmark approaches on eight HD test databases. The figures in red and blue indicate the lowest and second lowest OR values respectively in each column.

| SROCC $\uparrow$ (SS)      | NFLX          | NFLX-P        | BVI-HD        | BVI-CCHD      | BVI-CCHDDO    | MCL-V         | SHVC          | VQEGHD3       | Overall (SS)  |
|----------------------------|---------------|---------------|---------------|---------------|---------------|---------------|---------------|---------------|---------------|
| Full Reference VQA Methods |               |               |               |               |               |               |               |               |               |
| PSNR                       | 0.9787        | 0.9866        | 0.8893        | 0.9384        | 0.9542        | 0.9722        | 0.9286        | 0.9325        | 0.9476        |
| SSIM [25]                  | 0.9798        | 0.9802        | 0.8893        | 0.9407        | 0.9407        | 0.9742        | 0.9286        | 0.9272        | 0.9451        |
| MS-SSIM [26]               | 0.9852        | 0.9866        | 0.8893        | 0.9407        | 0.9327        | <b>0.9861</b> | 0.9286        | 0.9325        | 0.9477        |
| WaDIQA [1]                 | 0.9150        | 0.9403        | 0.8791        | 0.8858        | 0.9360        | 0.8627        | 0.8765        | 0.8514        | 0.8934        |
| DeepQA [10]                | 0.9064        | 0.8974        | 0.8464        | 0.8906        | 0.9088        | 0.8944        | 0.8594        | 0.8799        | 0.8854        |
| LPIPS [29]                 | 0.9852        | 0.9866        | 0.8734        | 0.9291        | 0.9569        | 0.9325        | 0.9345        | 0.9325        | 0.9413        |
| DeepVQA [11]               | 0.9205        | 0.9237        | 0.8904        | 0.8902        | 0.9372        | 0.8994        | 0.8891        | 0.8950        | 0.9060        |
| C3DVQA [27]                | 0.9754        | 0.9866        | 0.8782        | 0.9291        | 0.9475        | 0.9881        | 0.9167        | 0.9325        | 0.9443        |
| DISTS [5]                  | 0.9852        | 0.9866        | 0.8680        | 0.9345        | 0.9609        | 0.9762        | 0.9167        | 0.9299        | 0.9447        |
| ST-GREED [17]              | 0.9852        | 0.9866        | 0.8875        | 0.9338        | 0.9340        | 0.9802        | 0.9286        | 0.9325        | 0.9460        |
| VMAF 0.6.1 [15]            | 0.9852        | 0.9866        | 0.8893        | 0.9431        | 0.9367        | 0.9683        | 0.9226        | 0.9325        | 0.9455        |
| <b>FR-RankDVQA</b>         | <b>0.9896</b> | <b>0.9966</b> | <b>0.9492</b> | <b>0.9837</b> | <b>0.9788</b> | <b>0.9861</b> | <b>0.9786</b> | <b>0.9884</b> | <b>0.9814</b> |
| No reference VQA methods   |               |               |               |               |               |               |               |               |               |
| VIIDEO [20]                | 0.6877        | 0.6662        | 0.2656        | 0.3260        | 0.3145        | 0.0317        | 0.2024        | 0.4245        | 0.3648        |
| TLVQM [12]                 | 0.8405        | 0.8437        | 0.8104        | 0.8102        | 0.8572        | 0.8094        | 0.8051        | 0.815         | 0.8239        |
| VSFA [13]                  | 0.5117        | 0.5953        | 0.3844        | 0.8047        | 0.6714        | 0.8036        | 0.2679        | 0.7976        | 0.6046        |
| BRISQUE [19]               | <b>0.9825</b> | 0.9847        | 0.6792        | 0.8627        | 0.7980        | 0.7560        | 0.5774        | 0.9417        | 0.8236        |
| NIQE [21]                  | 0.9342        | 0.9743        | 0.7668        | 0.8114        | 0.9044        | 0.7202        | 0.8750        | <b>0.9510</b> | 0.8672        |
| MDTVSFA [14]               | 0.9785        | 0.9847        | 0.8875        | 0.8786        | 0.9340        | 0.6607        | 0.8333        | 0.9404        | 0.8872        |
| CONVIQT [18]               | 0.7611        | 0.9494        | 0.7488        | 0.7562        | 0.8168        | 0.9037        | 0.8571        | 0.8596        | 0.8322        |
| RAPIQUE [24]               | 0.9820        | 0.9847        | 0.8262        | 0.8606        | 0.8963        | 0.6687        | 0.9048        | 0.9378        | 0.8877        |
| VIDEVAL [23]               | 0.8524        | 0.8664        | 0.8345        | 0.8527        | 0.9114        | 0.8154        | 0.9022        | 0.8619        | 0.8621        |
| GSTVQA [4]                 | 0.9101        | 0.9105        | 0.8776        | <b>0.8795</b> | <b>0.9470</b> | 0.8608        | 0.9145        | 0.9113        | 0.9014        |
| <b>NR-RankDVQA</b>         | <b>0.9825</b> | <b>0.9850</b> | <b>0.8897</b> | 0.8616        | 0.9179        | <b>0.9048</b> | <b>0.9286</b> | <b>0.9425</b> | <b>0.9266</b> |

Table 6. The single source based SROCC value for the proposed methods and other benchmark approaches on eight HD test databases. The figures in red indicate the highest SROCC values in each column.

| SROCC $\uparrow$       | NFLX          | NFLX-P        | BVI-HD        | BVI-CCHD      | BVI-CCHDDO    | MCL-V         | SHVC          | VQEGHD3       | Overall       |
|------------------------|---------------|---------------|---------------|---------------|---------------|---------------|---------------|---------------|---------------|
| Ablation Study Results |               |               |               |               |               |               |               |               |               |
| V1 ( $\ell_1$ )        | 0.8793        | 0.8816        | 0.7583        | 0.7792        | 0.8523        | 0.7678        | 0.8238        | 0.8501        | 0.8190        |
| V2 ( $\ell_2$ )        | 0.8812        | 0.8883        | 0.7612        | 0.7794        | 0.8568        | 0.7696        | 0.8234        | 0.8507        | 0.8263        |
| V3 (C3D)               | 0.9034        | 0.8964        | 0.8233        | 0.8763        | 0.8961        | 0.8054        | 0.8692        | 0.8465        | 0.8653        |
| V4 (S1)                | 0.9201        | 0.8983        | 0.8361        | 0.8825        | 0.8987        | 0.8231        | 0.8966        | 0.8544        | 0.8762        |
| V5 (Res)               | 0.9002        | 0.8803        | 0.8203        | 0.8963        | 0.8982        | 0.8354        | 0.8312        | 0.8765        | 0.8673        |
| <b>FR-RankDVQA</b>     | <b>0.9393</b> | <b>0.9184</b> | <b>0.8659</b> | <b>0.8991</b> | <b>0.9037</b> | <b>0.8391</b> | <b>0.9142</b> | <b>0.8979</b> | <b>0.8972</b> |

Table 7. Comprehensive ablation study results in terms of SROCC on eight HD test databases.

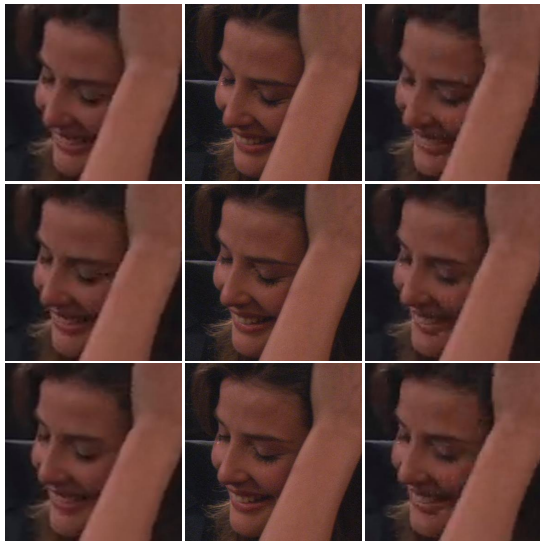

| Distorted A | Reference  | Distorted B |
|-------------|------------|-------------|
| 56.58       | ✓ Human    | 51.10       |
| 64.71       | VMAF ✓     | 66.19       |
| 67.49       | ✓ RankDVQA | 60.08       |

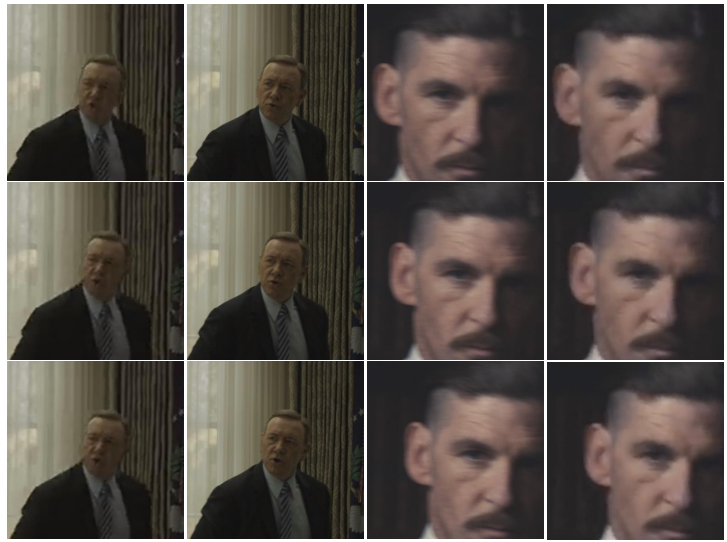

| Distorted A | Reference A | Reference B | Distorted B |
|-------------|-------------|-------------|-------------|
| 48.43       | Human       | Human ✓     | 72.65       |
| 74.4415     | ✓ VMAF      | VMAF        | 74.42       |
| 61.77       | RankDVQA    | RankDVQA ✓  | 76.78       |

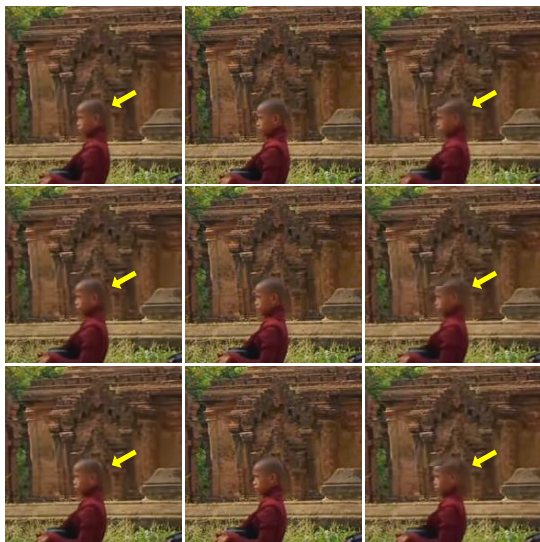

| Distorted A | Reference  | Distorted B |
|-------------|------------|-------------|
| 77.57       | ✓ Human    | 61.24       |
| 84.83       | VMAF ✓     | 87.62       |
| 79.69       | ✓ RankDVQA | 70.55       |

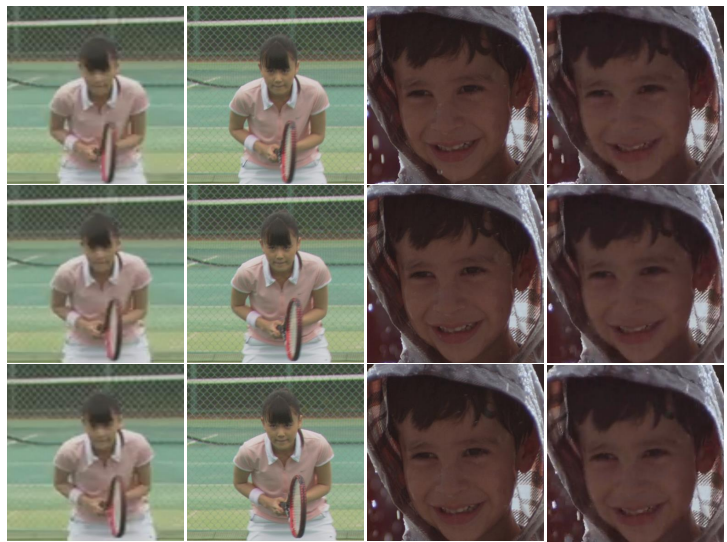

| Distorted A | Reference A | Reference B | Distorted B |
|-------------|-------------|-------------|-------------|
| 50.00       | Human       | Human ✓     | 82.50       |
| 69.56       | ✓ VMAF      | VMAF        | 60.37       |
| 68.41       | RankDVQA    | RankDVQA ✓  | 74.98       |

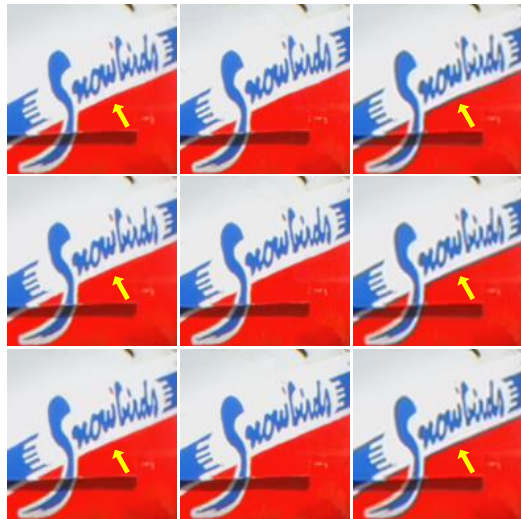

| Distorted A |   | Reference |   | Distorted B |
|-------------|---|-----------|---|-------------|
| 85.75       | ✓ | Human     |   | 73.10       |
| 86.85       |   | VMAF      | ✓ | 86.90       |
| 89.45       | ✓ | RankDVQA  |   | 83.47       |

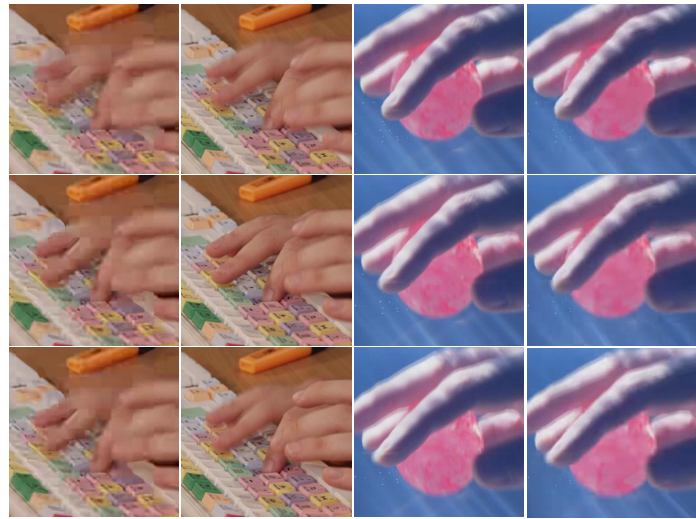

| Distorted A |   | Reference A |  | Reference B |   | Distorted B |
|-------------|---|-------------|--|-------------|---|-------------|
| 41.78       |   | Human       |  | Human       | ✓ | 80.72       |
| 38.82       | ✓ | VMAF        |  | VMAF        |   | 38.45       |
| 32.19       |   | RankDVQA    |  | RankDVQA    | ✓ | 67.83       |

Figure 1. Additional visual examples demonstrating the superiority of the proposed FR quality metric. From top to bottom, the three images in each column correspond to three consecutive frames in the same sequence. The left frames are from single-source, and the right frames are from dual-source. FR-RankDVQA correctly predicts a higher quality index for the distorted video with a higher subjective quality score.



## References

- [1] Sebastian Bosse, Dominique Maniry, Klaus-Robert Müller, Thomas Wiegand, and Wojciech Samek. Deep neural networks for no-reference and full-reference image quality assessment. *IEEE Transactions on Image Processing*, 27(1):206–219, 2018. 1, 2, 3, 4, 5, 6
- [2] F. Bossen, J. Boyce, X. Li, V. Seregin, and K. Sühning. JVET common test conditions and software reference configurations for SDR video. In *the JVET Meetings, JVET-M1001*. ITU-T and ISO/IEC, 2019. 2
- [3] Cristian Bucilua, Rich Caruana, and Alexandru Niculescu-Mizil. Model compression. In *Proceedings of the 12th ACM SIGKDD international conference on Knowledge discovery and data mining*, pages 535–541, 2006. 3
- [4] Baoliang Chen, Lingyu Zhu, Guo Li, Fangbo Lu, Hongfei Fan, and Shiqi Wang. Learning generalized spatial-temporal deep feature representation for no-reference video quality assessment. *IEEE Transactions on Circuits and Systems for Video Technology*, 32(4):1903–1916, 2022. 2, 3, 4, 5, 6
- [5] Keyan Ding, Kede Ma, Shiqi Wang, and Eero P Simoncelli. Image quality assessment: Unifying structure and texture similarity. *IEEE Transactions on Pattern Analysis and Machine Intelligence*, 44(5):2567–2581, 2020. 2, 3, 4, 5, 6
- [6] Advanced Encoding Guide. x264 general settings. <https://silentaperture.gitlab.io/mdbook-guide/encoding/x264.html>, 2011. 2
- [7] Advanced Encoding Guide. the fifth workshop and challenge on learned image compression (video track). <http://compression.cc/>, 2022. 1
- [8] Geoffrey Hinton, Oriol Vinyals, Jeff Dean, et al. Distilling the knowledge in a neural network. *arXiv preprint arXiv:1503.02531*, 2(7), 2015. 3
- [9] Qiqi Hou, Abhijay Ghildyal, and Feng Liu. A perceptual quality metric for video frame interpolation. In *Computer Vision—ECCV 2022: 17th European Conference, Tel Aviv, Israel, October 23–27, 2022, Proceedings, Part XV*, pages 234–253. Springer, 2022. 1
- [10] Jongyoo Kim and Sanghoon Lee. Deep learning of human visual sensitivity in image quality assessment framework. In *2017 IEEE Conference on Computer Vision and Pattern Recognition (CVPR)*, pages 1969–1977, 2017. 2, 3, 4, 5, 6
- [11] Woojae Kim, Jongyoo Kim, Sewoong Ahn, Jinwoo Kim, and Sanghoon Lee. Deep video quality assessor: From spatio-temporal visual sensitivity to a convolutional neural aggregation network. In *Proceedings of the European Conference on Computer Vision (ECCV)*, pages 219–234, 2018. 1, 2, 3, 4, 5, 6
- [12] Jari Korhonen. Two-level approach for no-reference consumer video quality assessment. *IEEE Transactions on Image Processing*, 28(12):5923–5938, 2019. 2, 3, 4, 5, 6
- [13] Dingquan Li, Tingting Jiang, and Ming Jiang. Quality assessment of in-the-wild videos. In *Proceedings of the 27th ACM International Conference on Multimedia*, pages 2351–2359, 2019. 1, 2, 3, 4, 5, 6
- [14] Dingquan Li, Tingting Jiang, and Ming Jiang. Unified quality assessment of in-the-wild videos with mixed datasets training. *International Journal of Computer Vision*, 129:1238–1257, 2021. 2, 3, 4, 5, 6
- [15] Z. Li, A. Aaron, I. Katsavounidis, A. Moorthy, and M. Manohara. Toward a practical perceptual video quality metric. *The Netflix Tech Blog*, 2016. 2, 3, 4, 5, 6
- [16] Di Ma, Fan Zhang, and David Bull. BVI-DVC: a training database for deep video compression. *IEEE Transactions on Multimedia*, 2021. 1
- [17] Pavan C. Madhusudana, Neil Birkbeck, Yilin Wang, Balu Adsumilli, and Alan C. Bovik. St-greed: Space-time generalized entropic differences for frame rate dependent video quality prediction. *IEEE Transactions on Image Processing*, 30:7446–7457, 2021. 2, 3, 4, 5, 6
- [18] Pavan C. Madhusudana, Neil Birkbeck, Yilin Wang, Balu Adsumilli, and Alan C. Bovik. Conviqt: Contrastive video quality estimator, 2022. 1, 2, 3, 4, 5, 6
- [19] Anish Mittal, Anush Krishna Moorthy, and Alan Conrad Bovik. No-reference image quality assessment in the spatial domain. *IEEE Transactions on Image Processing*, 21(12):4695–4708, 2012. 2, 3, 4, 5, 6
- [20] Anish Mittal, Michele A Saad, and Alan C Bovik. A completely blind video integrity oracle. *IEEE Transactions on Image Processing*, 25(1):289–300, 2015. 2, 3, 4, 5, 6
- [21] Anish Mittal, Rajiv Soundararajan, and Alan C Bovik. Making a “completely blind” image quality analyzer. *IEEE Signal Processing Letters*, 20(3):209–212, 2012. 2, 3, 4, 5, 6
- [22] K. Sharman and K. Suehring. Common test conditions for hm video coding experiments. In *the JCT-VC meeting, JCTVC-AF1100*. ITU-T, ISO/IEC, 2018. 2
- [23] Zhengzhong Tu, Yilin Wang, Neil Birkbeck, Balu Adsumilli, and Alan C. Bovik. UGC-VQA: Benchmarking blind video quality assessment for user generated content. *IEEE Transactions on Image Processing*, 30:4449–4464, 2021. 2, 3, 4, 5, 6
- [24] Zhengzhong Tu, Xiangxu Yu, Yilin Wang, Neil Birkbeck, Balu Adsumilli, and Alan C Bovik. Rapique: Rapid and accurate video quality prediction of user generated content. *IEEE Open Journal of Signal Processing*, 2:425–440, 2021. 1, 2, 3, 4, 5, 6
- [25] Zhou Wang, A.C. Bovik, H.R. Sheikh, and E.P. Simoncelli. Image quality assessment: from error visibility to structural similarity. *IEEE Transactions on Image Processing*, 13(4):600–612, 2004. 2, 3, 4, 5, 6
- [26] Z. Wang, E. P. Simoncelli, and A. C. Bovik. Multi-scale structural similarity for image quality assessment. In *Proc. Asilomar Conference on Signals, Systems and Computers*, volume 2, page 1398. IEEE, 2003. 2, 3, 4, 5, 6
- [27] Munan Xu, Junming Chen, Haiqiang Wang, Shan Liu, Ge Li, and Zhiqiang Bai. C3DVQA: Full-reference video quality assessment with 3d convolutional neural network. In *ICASSP 2020 - 2020 IEEE International Conference on Acoustics, Speech and Signal Processing (ICASSP)*, pages 4447–4451, 2020. 1, 2, 3, 4, 5, 6
- [28] Fan Zhang, Angeliki V Katsenou, Mariana Afonso, Goce Dimitrov, and David R Bull. Comparing VVC, HEVC and AV1 using objective and subjective assessments. *arXiv preprint arXiv:2003.10282*, 2020. 2

[29] Richard Zhang, Phillip Isola, Alexei A. Efros, Eli Shechtman, and Oliver Wang. The unreasonable effectiveness of deep features as a perceptual metric. In *Proceedings of the*

*IEEE Conference on Computer Vision and Pattern Recognition (CVPR)*, June 2018. [2](#), [3](#), [4](#), [5](#), [6](#)
